# Supplementary material for: The Ameliorative Effect of Dexamethasone on the Development of Autoimmune Lung Injury and Mediastinal Fat-Associated Lymphoid Clusters in an Autoimmune Disease Mouse Model
Source: Int J Mol Sci. 2022 Apr 18;23(8):4449. doi: 10.3390/ijms23084449 (PMC9027674; doi:10.3390/ijms23084449)
Supplement: Supplementary file 1 [file ijms-23-04449-s001.zip › ijms-1640196-supplementary.pdf]

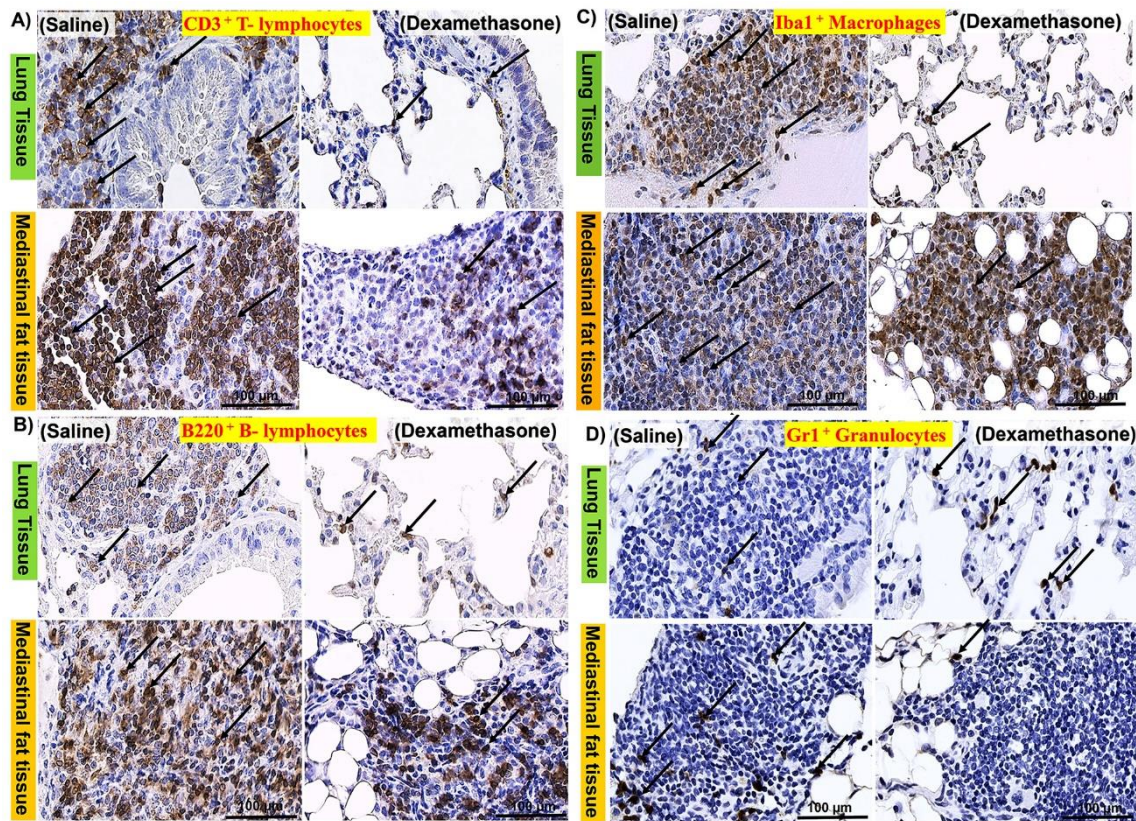

**Figure S1.** Representative photomicrograph of the immune cell populations in the lung, and mediastinal fat tissues of saline and dexamethasone groups in female Lpr mice. (A-D) Immunohistochemical-staining of the lung and mediastinal fat tissue of saline and dexamethasone groups for detection of CD3<sup>+</sup> T-lymphocytes (A), B220<sup>+</sup> B-lymphocytes (B), Iba-1<sup>+</sup> macrophages (C), and Gr-1<sup>+</sup> granulocytes (D). Notice immune-positive cells (arrows).

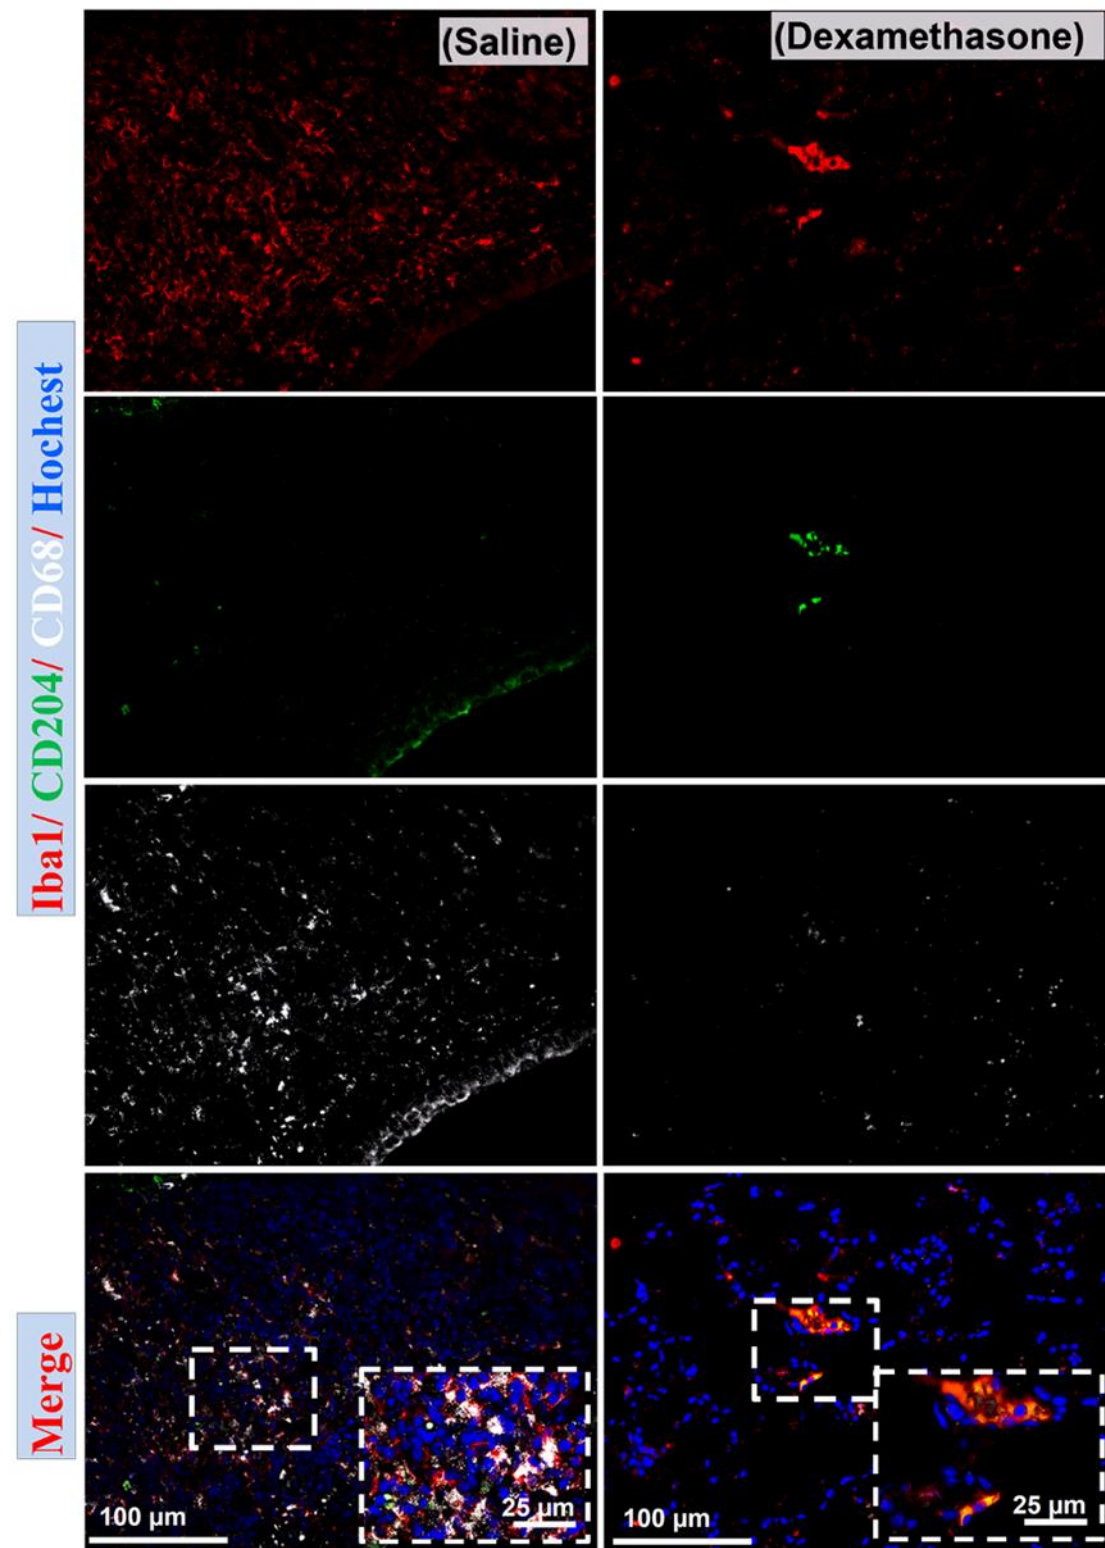

**Figure S2.** Representative photomicrograph of the macrophage's subsets, in the lung tissues of saline and dexamethasone groups in female Lpr mice. Triple immunofluorescent staining of Iba-1<sup>+</sup> macrophages (red), CD86<sup>+</sup> M1 (white) and CD204<sup>+</sup> M2 (green) in the lung of saline and dexamethasone groups. Notice merged photograph with Hoechst nuclear staining (blue).

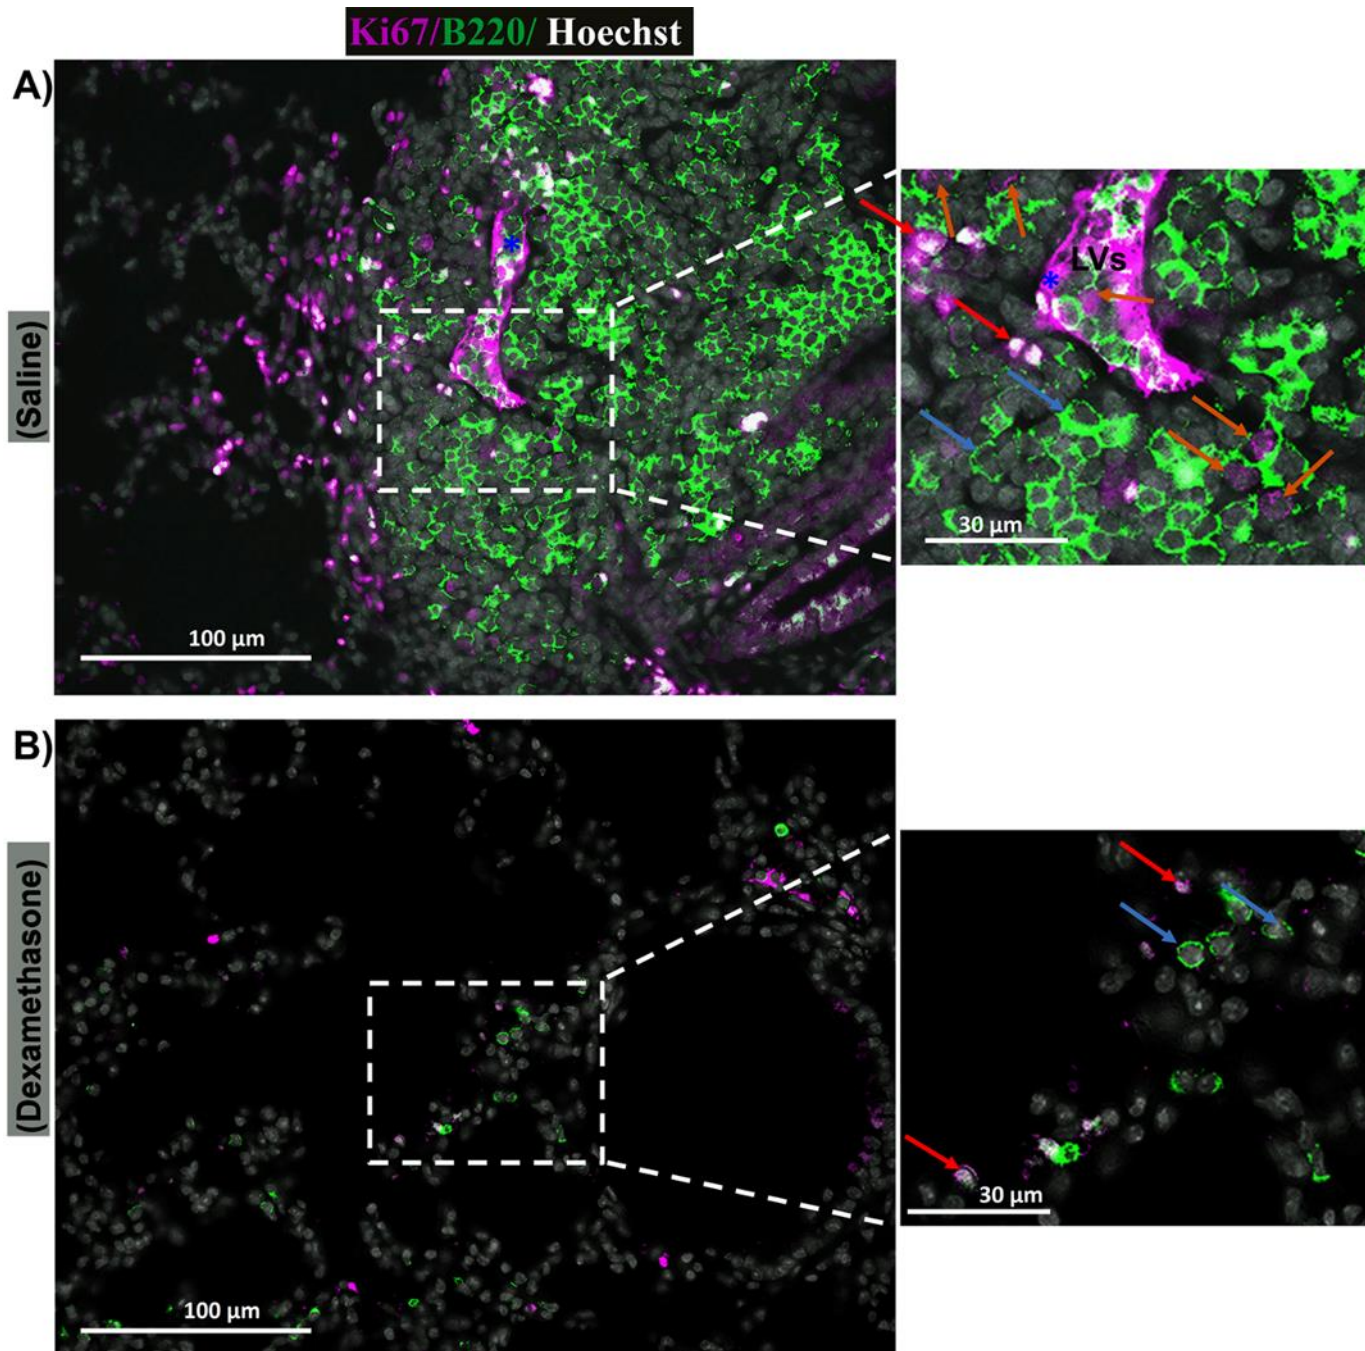

**Figure S3.** Representative photomicrograph of the co-staining for Ki67<sup>+</sup> proliferating cell and the B220<sup>+</sup> B-lymphocytes, in the lung tissues of saline and dexamethasone groups in female Lpr mice. Double immunofluorescent staining of Ki67<sup>+</sup> proliferating cell (magenta), and B220<sup>+</sup> B-lymphocytes (green) in the lung of saline and dexamethasone groups. Nuclear staining with Hoechst (white). The merged photographs revealed B220<sup>+</sup> B-lymphocytes (blue arrows), Ki67<sup>+</sup> proliferating cells (red arrows), Ki67<sup>+</sup> B220<sup>+</sup> proliferating B-lymphocytes (orange arrows). Notice lymphatic vessel (LVs) engorged with lymphocytes and their lining endothelial cells were Ki67<sup>+</sup> (blue asterisk).

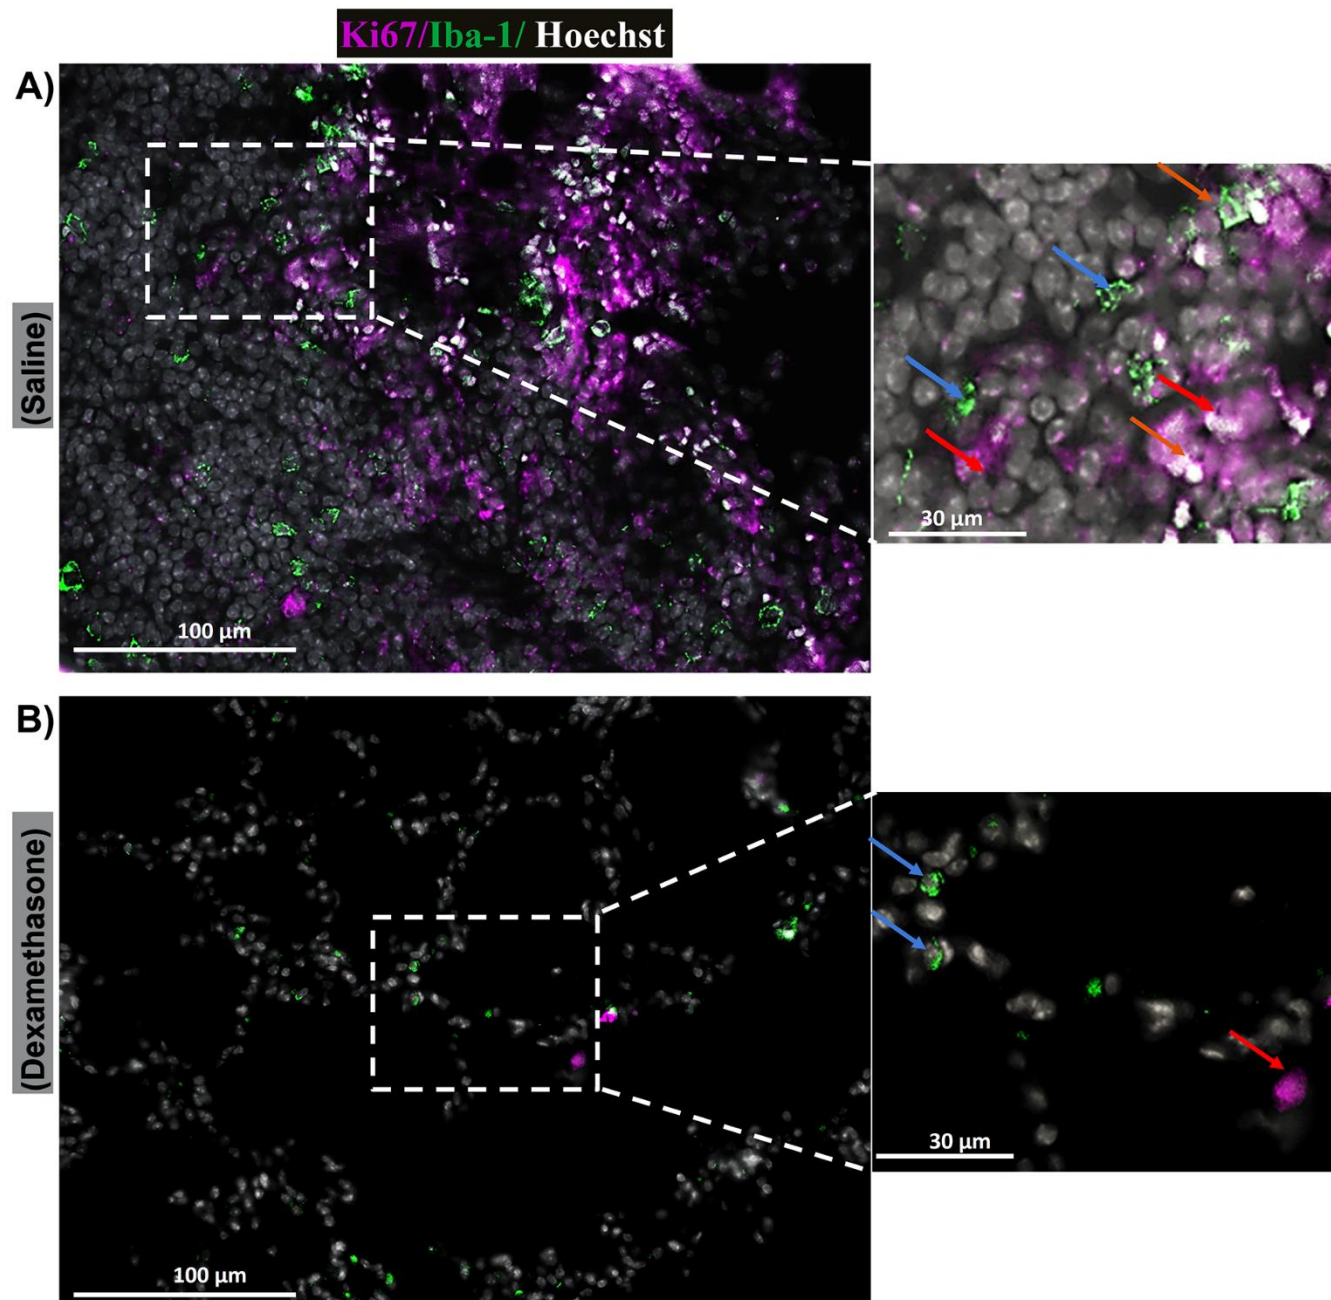

**Figure S4.** Representative photomicrograph of the co-staining for Ki67<sup>+</sup> proliferating cell and the Iba-1<sup>+</sup> macrophages, in the lung tissues of saline and dexamethasone groups in female Lpr mice. Double immunofluorescent staining of Ki67<sup>+</sup> proliferating cell (magenta), and Iba-1<sup>+</sup> macrophages (green) in the lung of saline and dexamethasone groups. Nuclear staining with Hoechst (white). The merged photographs revealed Iba-1<sup>+</sup> macrophages (blue arrows), Ki67<sup>+</sup> proliferating cells (red arrows), Ki67<sup>+</sup> Iba-1<sup>+</sup> proliferating macrophage (orange arrow).

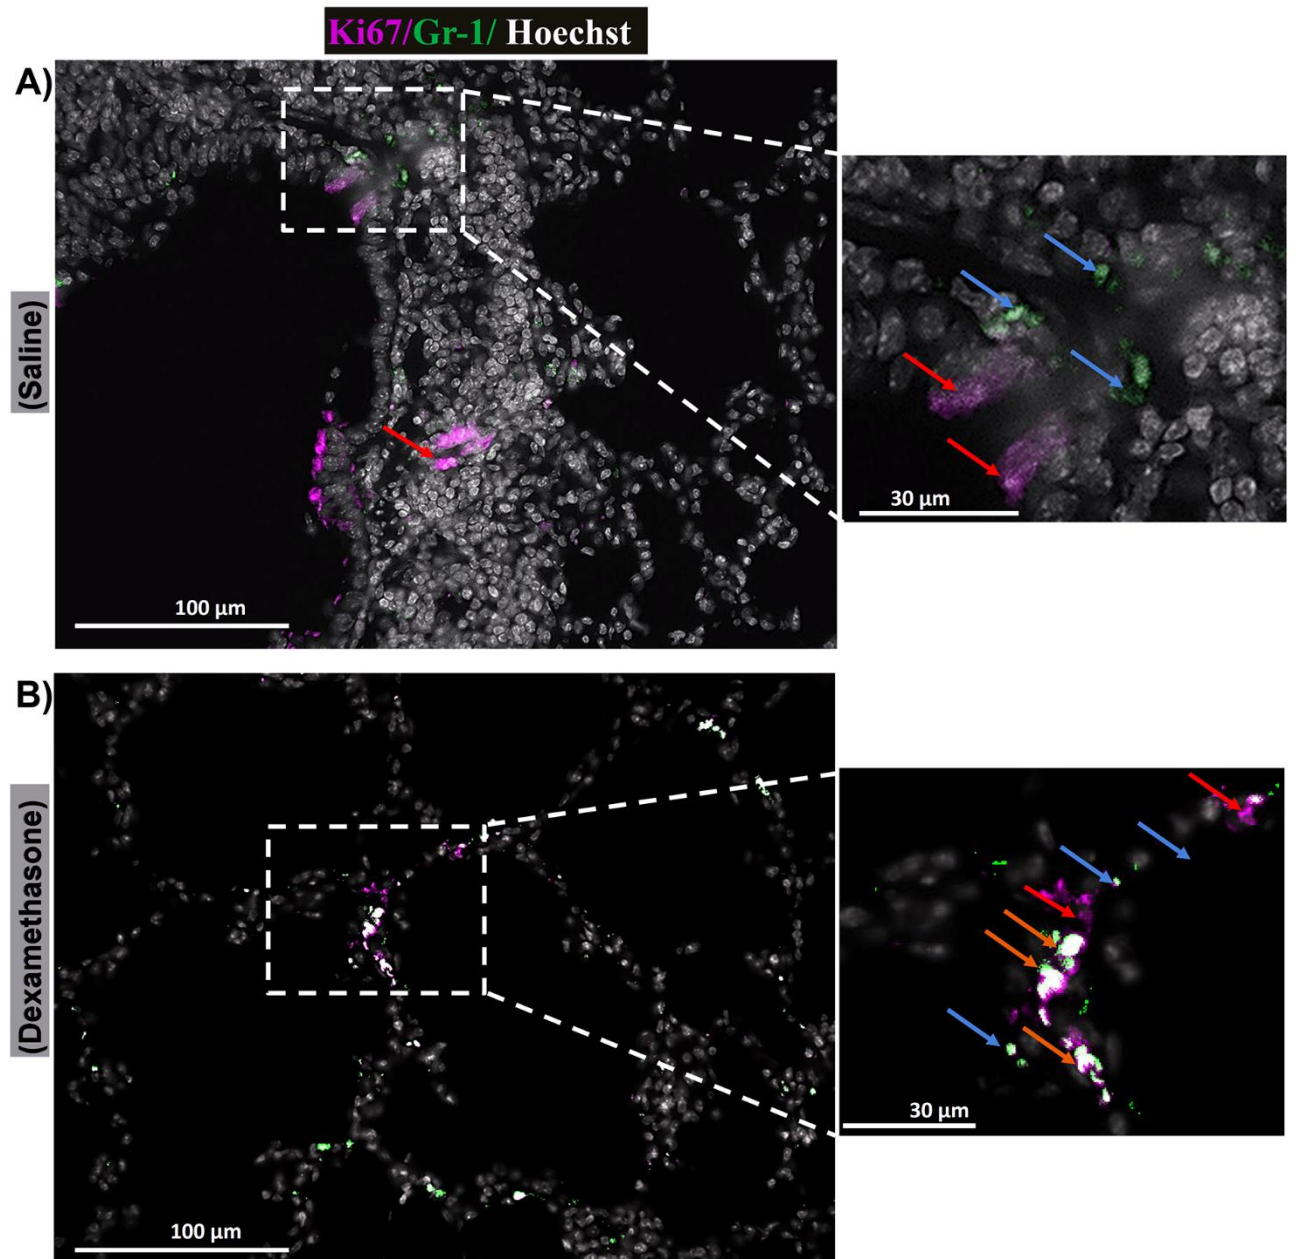

**Figure S5.** Representative photomicrograph of the co-staining for Ki67<sup>+</sup> proliferating cell and the Gr-1<sup>+</sup> macrophages, in the lung tissues of saline and dexamethasone groups in female Lpr mice. Double immunofluorescent staining of Ki67<sup>+</sup> proliferating cell (magenta), and Gr-1<sup>+</sup> granulocytes (green) in the lung of saline and dexamethasone groups. Nuclear staining with Hoechst (white). The merged photographs revealed Gr-1<sup>+</sup> granulocytes (blue arrows), Ki67<sup>+</sup> proliferating cells (red arrows), Ki67<sup>+</sup> Gr-1<sup>+</sup> proliferating granulocytes (orange arrows).

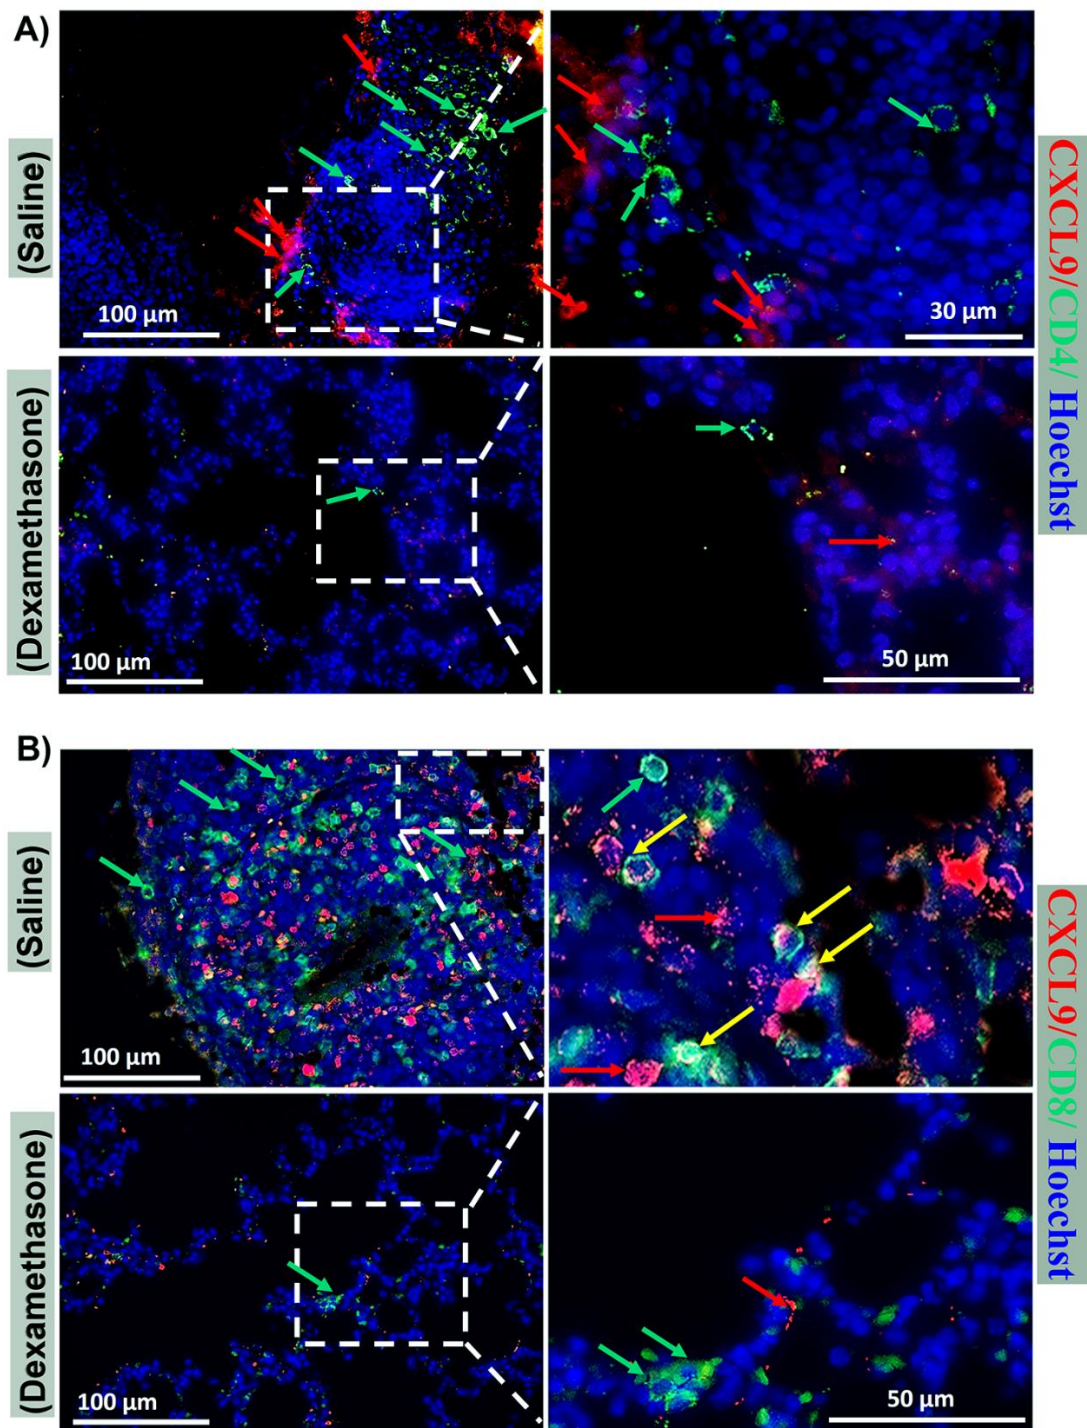

**Figure S6. Analysis of the effect of dexamethasone on the expression of CXCL9 along with either CD4 or CD8 positive T-lymphocytes in the lung of female Lpr mice. (A-B)** Representative merged images of double immunofluorescent staining for anti-CXCL9 (red) with either anti-CD4 “green” (A) or anti-CD8 “green” (B) antibodies, and Hoechst nuclear staining (blue). Notice positive reaction for CXCL9 (red arrows), CD4/ CD8 (green arrows), and CXCL9<sup>+</sup>/ CD8<sup>+</sup> co-stained cells (yellow arrows).
